# Supplementary material for: Single-cell dynamics of pannexin-1-facilitated programmed ATP loss during apoptosis
Source: eLife. 2020 Oct 14;9:e61960. doi: 10.7554/eLife.61960 (PMC7556867; doi:10.7554/eLife.61960)
Supplement: Figure 6—source data 1. [file elife-61960-fig6-data1.xlsx]

## Sheet: Sheet1
WT	PANX1KO2
2152900	1406500
1270800	301270
296070	2295700
85978	1615300
520170	1057400
40408	4066100
620980	1171700
885870	1583700
709410	1354000
533280	153910
733340	4191900
570320	1188000
442150	354090
534070	671570
992620	65056
218350	2753400
502470	36042
20764	206530
522020	1061100
182250	356100
83287	1388500
82300	114630
98882	20637
57295	16205
794330	16196
505030	712070
137270	419150
842070	1245400
495660	1691700
359220	525340
83803	361080
1332200	45410
322540	197320
95085	15837
50858	24770
356610	14745
301030	2062300
75919	1146500
31015	28833
30603	1143200
132270	86227
29105	1703800
211740	1001700
738020	1328500
297640	580340
496410	633670
94386	207120
157700	920810
533110	2990800
26126	25167
693350	29678
144880	10790
472240	674700
45153	391540
253700	13323
83187	441090
126950	30429
23119	709020
25823	157820
22583	1111000
15759	1401300
19286	1735400
407360	317400
19777	32055
306010	90214
213400	592360
174790	13608
21538	883000
126200	1269600
43350	519700
31177	546150
15124	459560
20429	752780
21511	163850
14013	743250
32144	234160
14356	26252
53711	239710
14476	252300
56054	216300
257880	116310
14005	308250
18463	28528
21570	1411800
90853	335680
25907	84651
11269	112460
32315	535950
12412	499140
1166300	1612500
948220	148110
118720	16644
1393300	28642
736180	179580
1122300	14150
1182000	1169100
240360	99859
774790	1341900
833700	100450
689710	118780
302150	223870
949640	197370
632770	18926
534660	141430
1730200	93281
783620	9713
263600	12867
66503	28582
562140	40233
39668	34499
308980	19933
79081	26605
1761900	293070
250410	210710
128520	7894
199650	1793500
209220	1231100
315600	1772000
82547	1181800
240980	234920
55529	1610700
891690	1167500
328860	36766
1188200	776040
934550	82742
242450	197710
1306400	798330
35196	819720
128050	85563
158220	163460
42626	111190
170270	38074
31347	660190
256220	39610
182910	32006
265710	639330
574620	472920
1108500	576220
375130	241870
413710	858810
628280	426160
255330	342940
502470	13089
1052200	392050
199870	269320
275860	466060
165220	82753
99034	60608
138000	52416
334800	28053
34265	66935
127860	78190
536930	50479
77594	322480
652240	17994
117010	69980
228750	106040
76190	30997
34290	402900
318310	115640
122740	388420
161580	26967
12455	29928
23584	154960
329150	643790
109880	24348
189470	349320
127020	13659
27307	548910
511710	9053
131650	456140
139870	7658
52477	13125
103730	605160
64257	20754
16485	136440
78014	103630
15058	385040
126010	11620
30049	124870
25348	22265
24694	50142
35395	23113
16929	16210
79815	11820
225260	24538
29734	35760
16492	32845
18024	365340
21055	19875
36413	6539
15285	120520
33056	10651
437920	171510
25508	18715
20636	16249
65483	12883
387600	5988
16407	9056
19663	4151400
23828	22468
40123	3930600
21054	1373300
15808	1414000
13578	33740
33221	542090
31216	222870
29367	281080
254210	505480
65794	1193600
17817	950840
32485	139890
11343	376280
19832	19136
20452	91277
16066	217300
90681	612000
67934	828680
19921	45222
37261	182130
7593	146950
41034	688120
8049	506630
23551	210760
20557	558760
13183	54019
35955	154450
12381	443600
13315	840660
16386	452530
20490	149180
7743	397330
10530	319760
158360	537530
101880	140670
8096	20263
20564	285300
24889	502150
154260	197550
19569	103950
83161	612470
12500	125790
708640	95878
2430300	58174
598680	114890
1086400	573010
914780	319570
229170	274750
119670	390620
688760	779230
1989900	224840
67687	108500
870250	184870
342010	426820
733490	191610
1242300	100620
309680	241390
310210	75830
1100700	528330
1518600	21992
278760	191890
244470	38060
26553	479800
1272300	242600
131930	24917
145530	128940
1710100	495560
142900	368240
2197000	28141
449580	43504
72543	244060
494990	149480
309700	738890
6388	44786
1705300	219120
1255500	403420
165920	293240
341100	130890
339890	502600
300870	292490
2000900	51134
40990	366700
193920	107370
15788	46793
278130	548850
394640	479230
67656	101910
240070	58582
103300	267040
65242	107440
278800	59624
222530	12113
67550	30908
152940	32117
226150	25371
452430	85351
117280	21729
313830	93605
88644	27063
187640	567910
477690	21179
145110	31713
232910	15912
66969	130220
869600	79162
284810	45871
104540	66251
116690	14186
413630	123860
343040	21666
755580	18924
82604	20559
393870	14999
2383100	10114
448860	30082
136390	42282
21851	217630
19066	293400
164360	63629
37655	162020
499950	61588
1479500	8105
68996
73228
90364
150270
130790
341170
63033
104860
922330
40127
47631
25320
19717
220800
119830
30054
113980
23198
14016
66351
122810
1270900
2181800
97121
23619
33853
602100
36973
69748
82834
15495
130730
413490
12866
1327700
7048
10584
