# Supplementary material for: Single-cell dynamics of pannexin-1-facilitated programmed ATP loss during apoptosis
Source: eLife. 2020 Oct 14;9:e61960. doi: 10.7554/eLife.61960 (PMC7556867; doi:10.7554/eLife.61960)
Supplement: Figure 7—source data 1. [file elife-61960-fig7-data1.xlsx]

## Sheet: Sheet1
Glucose consumption (µmol / 8 h)				Lactate release (µmol / 8 h)
	WT	PANX1-KO2			WT	PANX1-KO2
Experiment 1	9.9754	9.2283		Experiment 1	25.09	24.578
Experiment 2	9.8516	9.455		Experiment 2	21.291	19.561
Experiment 3	9.015	7.9248		Experiment 3	22.778	19.965
