# Supplementary material for: Single-cell dynamics of pannexin-1-facilitated programmed ATP loss during apoptosis
Source: eLife. 2020 Oct 14;9:e61960. doi: 10.7554/eLife.61960 (PMC7556867; doi:10.7554/eLife.61960)
Supplement: Figure 7—source data 2. [file elife-61960-fig7-data2.xlsx]

## Sheet: Sheet1
		Glucose consumption (µmol)
	Time (h)	Fas-WT (mean)	Fas-WT (SD)	Fas-KO (mean)	Fas-KO (SD)	UV-WT (mean)	UV-WT (SD)	UV-KO (mean)	UV-KO (SD)
	0	0	0	0	0	0	0	0	0
	8	5.6661	0.47443	5.0777	0.58077	5.5393	0.34498	4.6096	0.38885
	16	8.0899	0.61539	7.4839	0.31531	7.2334	0.25598	7.8132	0.44095
	24	8.1527	0.47859	10.249	0.4284	7.6247	0.57872	10.776	0.48197
	32	9.2136	0.49641	14.847	2.0216	8.904	1.0854	15.208	2.1078
