# Supplementary material for: Single-cell dynamics of pannexin-1-facilitated programmed ATP loss during apoptosis
Source: eLife. 2020 Oct 14;9:e61960. doi: 10.7554/eLife.61960 (PMC7556867; doi:10.7554/eLife.61960)
Supplement: Figure 7—source data 3. [file elife-61960-fig7-data3.xlsx]

## Sheet: Sheet1
		Lactate release (µmol)
	Time (h)	Fas-WT (mean)	Fas-WT (SD)	Fas-KO (mean)	Fas-KO (SD)	UV-WT (mean)	UV-WT (SD)	UV-KO (mean)	UV-KO (SD)
	0	0	0	0	0	0	0	0	0
	8	15.957	0.33039	11.05	0.10014	13.968	1.3642	11.774	0.8178
	16	22.014	0.72118	19.461	0.69121	19.267	0.44692	20.395	0.61769
	24	23.367	1.0273	27.021	1.3418	20.907	0.15731	29.424	1.1717
	32	25.759	1.352	39.607	4.3742	24.883	1.645	42.262	3.8129
